# Supplementary material for: Correlates of Protection against Influenza in the Elderly: Results from an Influenza Vaccine Efficacy Trial
Source: PubMed Central journal article supplement — Clin Vaccine Immunol. 2016 Mar 7;23(3):228–35. doi: 10.1128/CVI.00604-15 (PMC4783426; doi:10.1128/cvi.00604-15), 2016-03-07
Supplement: CVI.00604-15_zcd999095320so1.pdf [file CVI.00604-15_zcd999095320so1.pdf]

Supplemental Figure 1. Flowchart of subjects and assays

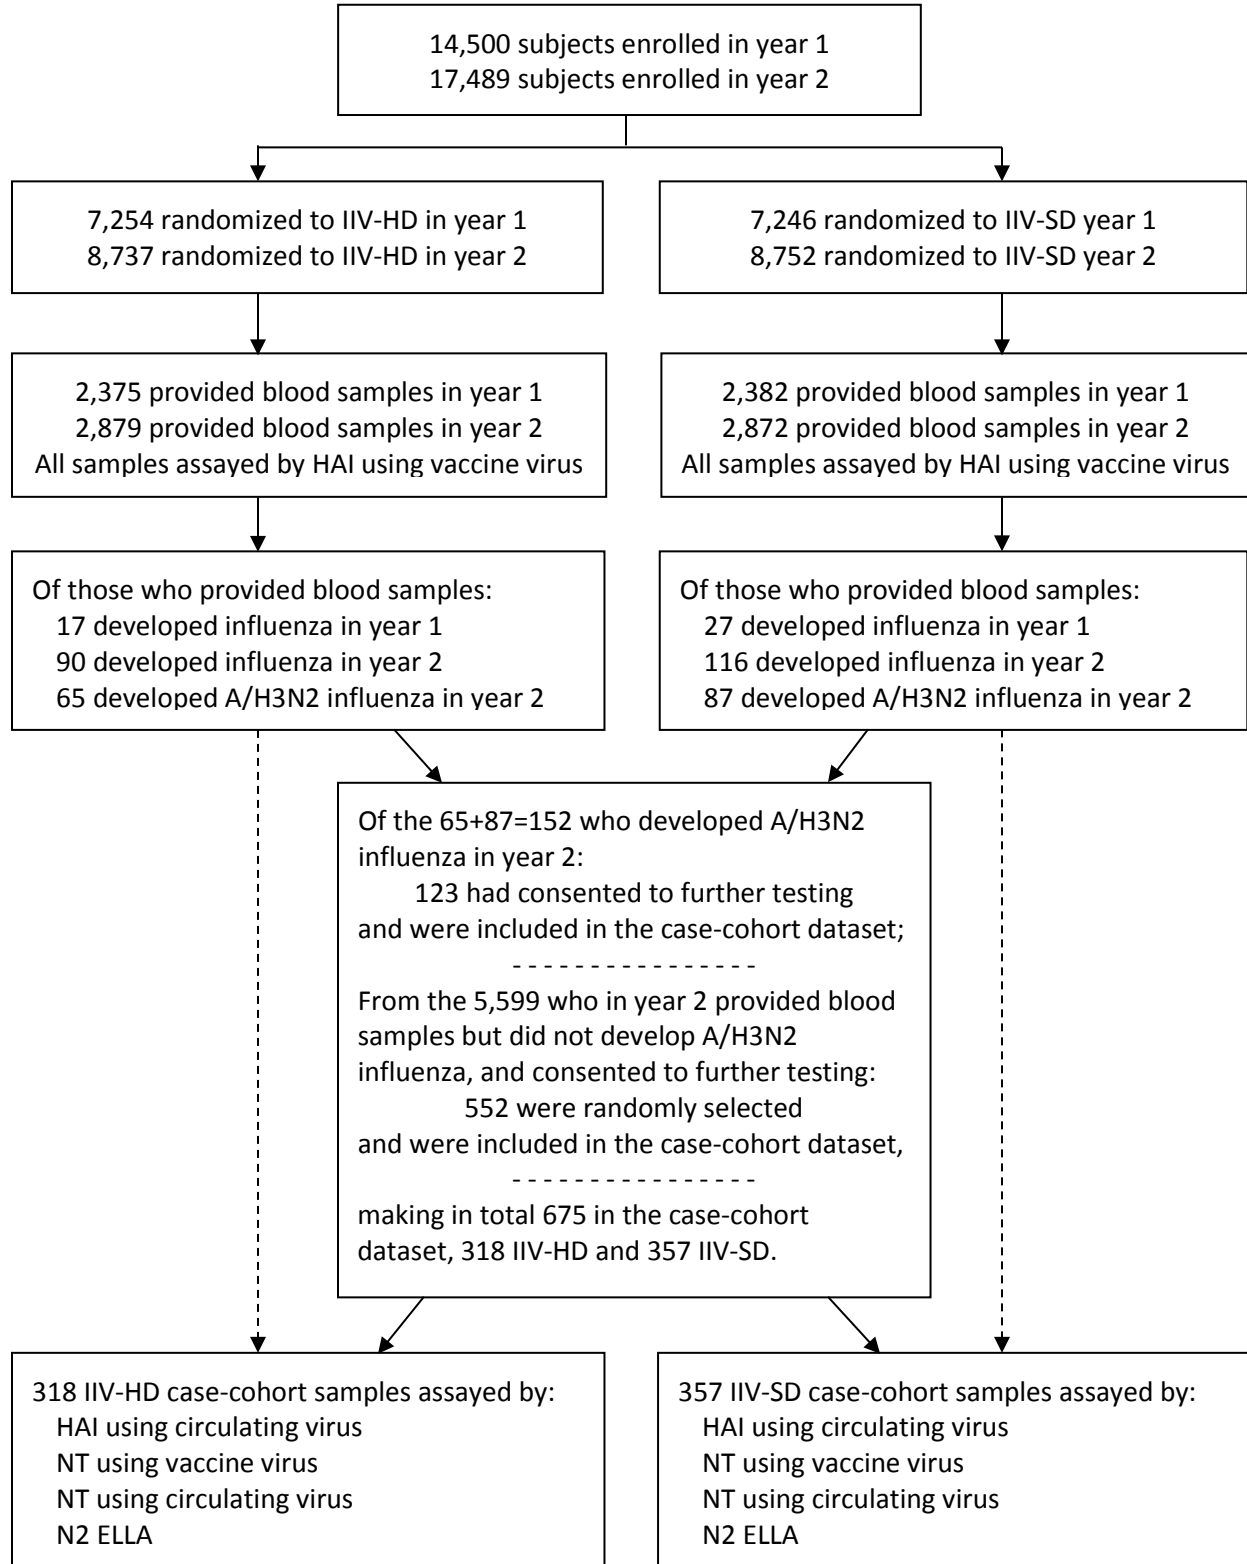

Supplemental Table 1. Associations between occurrence of A/H3N2 influenza illness and assay titers

| Case definition (n=no. of cases*)                                 | Coefficient for slope by logistic regression<br>(95% confidence interval) |                                         |                                    |                                        |                        |
|-------------------------------------------------------------------|---------------------------------------------------------------------------|-----------------------------------------|------------------------------------|----------------------------------------|------------------------|
|                                                                   | HAI,<br>vaccine<br>virus<br>N = 5752                                      | HAI,<br>circulating<br>virus<br>N = 673 | NT,<br>vaccine<br>virus<br>N = 675 | NT,<br>circulating<br>virus<br>N = 675 | N2 ELLA<br>N = 675     |
| Laboratory-confirmed Influenza associated with RI (n=152/123)     | -0.50<br>(-0.65;-0.34)                                                    | -0.64<br>(-0.87;-0.41)                  | -0.48<br>(-0.70;-0.27)             | -0.62<br>(-0.84;-0.41)                 | -0.36<br>(-0.56;-0.16) |
| Laboratory-confirmed Influenza associated with PD-ILI (n=121/98)  | -0.54<br>(-0.72;-0.37)                                                    | -0.61<br>(-0.85;-0.37)                  | -0.52<br>(-0.76;-0.29)             | -0.69<br>(-0.93;-0.45)                 | -0.38<br>(-0.60;-0.16) |
| Laboratory-confirmed Influenza associated with CDC-ILI (n=52/48)  | -0.79<br>(-1.06;-0.53)                                                    | -0.79<br>(-1.14;-0.43)                  | -0.77<br>(-1.11;-0.43)             | -0.81<br>(-1.13;-0.49)                 | -0.55<br>(-0.86;-0.25) |
| Antigenically similar Influenza associated with RI (n=37/34)      | -0.51<br>(-0.82;-0.19)                                                    | -0.70<br>(-1.10;-0.30)                  | -0.43<br>(-0.80;-0.06)             | -0.53<br>(-0.88;-0.17)                 | -0.68<br>(-1.04;-0.32) |
| Antigenically similar Influenza associated with PD-ILI (n=30/28)  | -0.57<br>(-0.92;-0.22)                                                    | -0.91<br>(-1.38;-0.44)                  | -0.50<br>(-0.91;-0.09)             | -0.72<br>(-1.12;-0.32)                 | -0.78<br>(-1.18;-0.38) |
| Antigenically similar Influenza associated with CDC-ILI (n=18/17) | -0.76<br>(-1.21;-0.31)                                                    | -0.91<br>(-1.51;-0.31)                  | -0.53<br>(-1.05;-0.01)             | -0.75<br>(-1.26;-0.25)                 | -0.81<br>(-1.31;-0.30) |

\*no. of cases: the first number is for the HAI, vaccine virus assay; the second is for the other assays.

Supplemental Table 2. Increase in proportion of treatment effect on A/H3N2 influenza illness occurrence explained by pairs of assays

| Case definition (n=no. of cases*)                              | Proportion of treatment effect explained by two assays<br>[by greater of each assay taken singly] (increase) |                                                     |                                                         |                                                    |                                                        |
|----------------------------------------------------------------|--------------------------------------------------------------------------------------------------------------|-----------------------------------------------------|---------------------------------------------------------|----------------------------------------------------|--------------------------------------------------------|
|                                                                | HAI,<br>circulating<br>virus, and<br>NT,<br>circulating<br>virus<br>N = 673                                  | HAI,<br>vaccine<br>virus, and<br>N2 ELLA<br>N = 675 | HAI,<br>circulating<br>virus, and<br>N2 ELLA<br>N = 673 | NT,<br>vaccine<br>virus, and<br>N2 ELLA<br>N = 675 | NT,<br>circulating<br>virus, and<br>N2 ELLA<br>N = 675 |
| Laboratory-confirmed Influenza associated with RI (n=123)      | 1.24 [1.32]<br>(-0.08)                                                                                       | 1.29 [0.82]<br>(0.46)                               | 0.99 [0.97]<br>(0.02)                                   | 1.17 [0.85]<br>(0.32)                              | 1.42 [1.32]<br>(0.09)                                  |
| Laboratory-confirmed Influenza associated with PD-ILI (n=98)   | 1.69 [1.81]<br>(-0.12)                                                                                       | 1.74 [0.95]<br>(0.79)                               | 1.21 [1.13]<br>(0.09)                                   | 1.61 [1.12]<br>(0.49)                              | 1.97 [1.81]<br>(0.15)                                  |
| Laboratory-confirmed Influenza associated with CDC-ILI (n=48)  | 0.93 [0.99]<br>(-0.06)                                                                                       | 1.15 [0.86]<br>(0.29)                               | 0.76 [0.65]<br>(0.10)                                   | 1.06 [0.75]<br>(0.31)                              | 1.15 [0.99]<br>(0.16)                                  |
| Antigenically similar Influenza associated with RI (n=34)      | 0.48 [0.49]<br>(-0.01)                                                                                       | 0.73 [0.53]<br>(0.20)                               | 0.65 [0.53]<br>(0.12)                                   | 0.71 [0.53]<br>(0.18)                              | 0.75 [0.53]<br>(0.23)                                  |
| Antigenically similar Influenza associated with PD-ILI (n=28)  | 0.74 [0.75]<br>(-0.01)                                                                                       | 0.91 [0.65]<br>(0.27)                               | 0.84 [0.65]<br>(0.19)                                   | 0.88 [0.65]<br>(0.23)                              | 1.06 [0.75]<br>(0.31)                                  |
| Antigenically similar Influenza associated with CDC-ILI (n=17) | 0.31 [0.32]<br>(-0.00)                                                                                       | 0.44 [0.28]<br>(0.16)                               | 0.36 [0.28]<br>(0.08)                                   | 1.17 [0.85]<br>(0.32)                              | 0.43 [0.32]<br>(0.12)                                  |

\*no. of cases: the first number is for the HAI, vaccine virus assay; the second is for the other assays.

Supplemental Table 3. Estimated titers for 80% protection against A/H3N2 influenza illness

| Case definition (n=no. of cases*)                                 | Titer for 80% protection<br>(95% confidence interval) |                                         |                                    |                                        | N2 ELLA<br>N = 675   |
|-------------------------------------------------------------------|-------------------------------------------------------|-----------------------------------------|------------------------------------|----------------------------------------|----------------------|
|                                                                   | HAI,<br>vaccine<br>virus<br>N = 5752                  | HAI,<br>circulating<br>virus<br>N = 673 | NT,<br>vaccine<br>virus<br>N = 675 | NT,<br>circulating<br>virus<br>N = 675 |                      |
| Laboratory-confirmed Influenza associated with RI (n=152/123)     | †                                                     | 79.9<br>(41.7; 129)                     | †                                  | #                                      | 288<br>(73.5; 541)   |
| Laboratory-confirmed Influenza associated with PD-ILI (n=121/98)  | †                                                     | 83.3<br>(25.9; 126)                     | †                                  | #                                      | †                    |
| Laboratory-confirmed Influenza associated with CDC-ILI (n=52/48)  | 422<br>(248; 575)                                     | 51.0<br>(15.6; 81.1)                    | #                                  | 221<br>(146; 685)                      | 39.6<br>(12.9; 332)  |
| Antigenically similar Influenza associated with RI (n=37/34)      | 1260<br>(206; 1883)                                   | 75.4<br>(26.6; 105)                     | #                                  | 167<br>(29.2; 3092)                    | 39.4<br>(23.7; 54.7) |
| Antigenically similar Influenza associated with PD-ILI (n=30/28)  | 1096<br>(150; 1758)                                   | 36.7<br>(16.7; 65.1)                    | #                                  | 151<br>(38.7; 1345)                    | 39.5<br>(20.8; 181)  |
| Antigenically similar Influenza associated with CDC-ILI (n=18/17) | 271<br>(129; 425)                                     | 27.5<br>(18.3; 98.1)                    | #                                  | 199<br>(62.3; 268)                     | 20.7<br>(11.5; 38.7) |

\* no. of cases: the first number is for the HAI, vaccine virus assay; the second is for the other assays;

† 80% protection not achieved;

# goodness-of-fit < 0.5.

Supplemental Table 4. Proportions of subjects with titers falling within the 95% confidence interval for 50% protection against A/H3N2 influenza illness

| Case definition (n=no. of cases*)                                 | Proportion of subjects with titers within the 95% CI for 50% protection |                                           |                                    |                                          | N2 ELLA<br>N = 675 |
|-------------------------------------------------------------------|-------------------------------------------------------------------------|-------------------------------------------|------------------------------------|------------------------------------------|--------------------|
|                                                                   | HAI,<br>vaccine<br>virus<br>N = 5752                                    | HAI,<br>circulat-<br>ing virus<br>N = 673 | NT,<br>vaccine<br>virus<br>N = 675 | NT,<br>circulat-<br>ing virus<br>N = 675 |                    |
| Laboratory-confirmed Influenza associated with RI (n=152/123)     | 47.3%                                                                   | 48.5%                                     | 73.9%                              | †                                        | 82.5%              |
| Laboratory-confirmed Influenza associated with PD-ILI (n=121/98)  | 53.4%                                                                   | 55.9%                                     | 43.7%                              | †                                        | 76.6%              |
| Laboratory-confirmed Influenza associated with CDC-ILI (n=52/48)  | 33.6%                                                                   | 58.0%                                     | †                                  | 38.2%                                    | 77.7%              |
| Antigenically similar Influenza associated with RI (n=37/34)      | 74.3%                                                                   | 68.6%                                     | †                                  | 79.7%                                    | 18.8%              |
| Antigenically similar Influenza associated with PD-ILI (n=30/28)  | 66.0%                                                                   | 58.5%                                     | †                                  | 70.3%                                    | 45.3%              |
| Antigenically similar Influenza associated with CDC-ILI (n=18/17) | 25.1%                                                                   | 49.0%                                     | †                                  | 31.8%                                    | 17.1%              |

\*no. of cases: the first number is for the HAI, vaccine virus assay; the second is for the other assays;

† goodness-of-fit < 0.5.

Supplemental Table 5. Relative vaccine efficacy predicted by the models compared to observed efficacy among subjects in the model: A/H3N2 influenza illness

| Case definition (n=no. of cases*)                                 | Relative efficacy observed, % | Relative efficacy predicted, % |                                   |                              |                                  | N2 ELLA<br>N = 675 |
|-------------------------------------------------------------------|-------------------------------|--------------------------------|-----------------------------------|------------------------------|----------------------------------|--------------------|
|                                                                   |                               | HAI, vaccine virus<br>N= 5752  | HAI, circulating virus<br>N = 673 | NT, vaccine virus<br>N = 675 | NT, circulating virus<br>N = 675 |                    |
| Laboratory-confirmed Influenza associated with RI (n=152/123)     | 25.4%                         | 20.8%                          | 33.8%                             | 37.0%                        | †                                | 29.6%              |
| Laboratory-confirmed Influenza associated with PD-ILI (n=121/98)  | 24.7%                         | 22.9%                          | 34.3%                             | 34.3%                        | †                                | 27.0%              |
| Laboratory-confirmed Influenza associated with CDC-ILI (n=52/48)  | 37.6%                         | 32.6%                          | 34.5%                             | †                            | 44.5%                            | 31.9%              |
| Antigenically similar Influenza associated with RI (n=37/34)      | 39.2%                         | 22.6%                          | 36.2%                             | †                            | 30.1%                            | 37.7%              |
| Antigenically similar Influenza associated with PD-ILI (n=30/28)  | 42.2%                         | 24.0%                          | 40.6%                             | †                            | 42.7%                            | 38.6%              |
| Antigenically similar Influenza associated with CDC-ILI (n=18/17) | 71.5%                         | 33.8%                          | 48.7%                             | †                            | 53.6%                            | 49.4%              |

\*no. of cases: the first number is for the HAI, vaccine virus assay; the second is for the other assays;

† goodness-of-fit < 0.5.
